1 **Brain-synthesized estrogens regulate cortical migration**  
2 **in a sexually divergent manner**

3 **Katherine J. Sellers<sup>1,2‡\*</sup>, Matthew C.S. Denley<sup>1,2‡</sup>, Atsushi Saito<sup>3</sup>, Atsushi Kamiya<sup>3</sup>,**  
4 **Deepak P. Srivastava<sup>1,2\*</sup>**

5 <sup>1</sup>Department of Basic and Clinical Neuroscience, Maurice Wohl Clinical Neuroscience  
6 Institute, Institute of Psychiatry, Psychology and Neuroscience, King's College London,  
7 London, SE5 9RT, UK

8 <sup>2</sup>MRC Centre for Neurodevelopmental Disorders, King's College London, London SE1 1UL,  
9 UK; <sup>3</sup>The Department of Psychiatry and Behavioral Sciences, John Hopkins University  
10 School of Medicine, Baltimore, MD, USA.

11

12 \* Corresponding Author: [Deepak.srivastava@kcl.ac.uk](mailto:Deepak.srivastava@kcl.ac.uk) or [Katherine.sellers@kcl.ac.uk](mailto:Katherine.sellers@kcl.ac.uk)

13 **Keywords: Aromatase, corticogenesis, neural stem cell, radial migration, neural**  
14 **development, Cyp19a1**

15

16

17 **Abstract**

18 Estrogens play an important role in the sexual dimorphisms that occur during brain  
19 development, including the neural circuitry that underlies sex-typical and socio-aggressive  
20 behaviors. Aromatase, the enzyme responsible for the conversion of androgens to  
21 estrogens, is expressed at high levels during early development in both male and female  
22 cortices, suggesting a role for brain-synthesized estrogens during corticogenesis. This study  
23 investigated how the local synthesis of estrogens affects neurodevelopment of the cerebral  
24 cortex, and how this differs in males and females by knockdown expression of the *Cyp19a1*  
25 gene, which encodes aromatase, between embryonic day 14.5 and postnatal day 0 (P0).  
26 The effects of *Cyp19a1* knockdown on neural migration was then assessed. Aromatase was  
27 expressed in the developing cortex of both sexes, but at significantly higher levels in male  
28 than female mice. Under basal conditions, no obvious differences in cortical migration  
29 between male and female mice were observed. However, knockdown of *Cyp19a1*  
30 increased the number GFP-positive cells in the cortical plate, with a concurrent decrease in  
31 the subventricular zone/ventricular zone in P0 male mice. The opposite effect was observed  
32 in females, with a significantly reduced number of GFP-positive cells migrating to the  
33 cortical plate. These findings have important implications for our understanding of the role of  
34 fetal steroids for neuronal migration during cerebral cortex development. Moreover, these  
35 data indicate that brain-synthesized estrogens regulate radial migration through distinct  
36 mechanisms in males and females.

37

## 38 Introduction

39 The unique organization and architecture of the cerebral cortex is established during  
40 embryonic development. This organization is achieved in an “in-side-out” fashion, with  
41 inner, or deep layers forming first, and outer, or superficial layers developing last  
42 (Evsyukova *et al.*, 2013). The development of the cortex and its laminar organization is  
43 controlled in large part by the coordinated processes of neurogenesis and cell migration.  
44 The process of radial neuronal migration is a multi-step process (Evsyukova *et al.*, 2013).  
45 Initially, newly born neurons, generated from neural stem cells, detach from the apical  
46 surface of the germinal ventricular zone (VZ). These neurons adopt a multi-polar  
47 morphology and move into the intermediate zone (IZ) (Noctor *et al.*, 2004). Here, neurons  
48 develop a bi-polar shape, and migrate along radial glia to their final position in the cortical  
49 plate (CP) (Kawauchi, 2015). Once in this position, neurons can begin to form synaptic  
50 connections, and thus contribute to circuit formation (Evsyukova *et al.*, 2013).

51

52 Several areas of the brain undergo sexually dimorphic development. During  
53 adolescent development, the brain undergoes differential development trajectories that lead  
54 to sexual dimorphism in total cerebral volume and different local grey matter nuclei volumes  
55 (Kaczurkin *et al.*, 2019). Notably, female total cerebral volume peaks earlier in  
56 adolescence than males (Lenroot *et al.*, 2007). In addition, analysis of neural circuitry and  
57 behavior reveals that different systems and regions within the brain are engaged in a sex-  
58 dependent manner and specific nuclei within the brain are thought to be responsible for sex-  
59 specific behaviors (Gillies & McArthur, 2010; Choleris *et al.*, 2018). The hippocampus and  
60 basolateral nucleus of the amygdala are necessary for sex-dependent learning (Bangasser  
61 & Shors, 2007; Waddell *et al.*, 2008). However, other regions of the brain also display

62 sexually dimorphic neural circuitry, including the bed nucleus of the stria terminalis  
63 (thalamus) and the medial prefrontal cortex (frontal lobe) (Bangasser & Shors, 2007; Maeng  
64 *et al.*, 2010). Structural differences at a macroscopic level are witnessed. For example,  
65 sexual dimorphism has been recorded in the preoptic area (hypothalamus), uncinate  
66 nucleus (hypothalamus), olfactory bulb (rostral frontal lobe), anterior commissure (white  
67 matter tract connecting hemispheres), interthalamic adhesion (thalamus), and mammillary  
68 body (diencephalon) (Allen & Gorski, 1991; Garcia-Falgueras & Swaab, 2008; Savic *et al.*,  
69 2010; Oliveira-Pinto *et al.*, 2014).

70 Estrogens, in particular 17 $\beta$ -estradiol (estradiol), are integral in establishing sexual  
71 dimorphisms during brain development, including the neural circuitry that underlies sex-  
72 typical and socio-aggressive behaviors (Gillies & McArthur, 2010; McCarthy *et al.*, 2018).  
73 Sex-hormones, especially estrogens such as estradiol, have consistently shown cognitive-  
74 enhancing properties and morphological regulatory responsibilities (Gillies & McArthur,  
75 2010; Sellers *et al.*, 2015a; Choleris *et al.*, 2018). By modulating spinogenesis,  
76 synaptogenesis, and synaptic connectivity, estrogen enacts rapid changes to the neural  
77 circuitry (Saldanha *et al.*, 2011; Srivastava *et al.*, 2013; Sellers *et al.*, 2015a; Sellers *et al.*,  
78 2015b). Steroid-dependent plasticity and circulating steroid hormones impact neuronal  
79 volume and numbers (Balthazart & Ball, 2006; Saldanha *et al.*, 2011; Srivastava *et al.*,  
80 2013). Interestingly, estrogens also stimulate the proliferation and differentiation of neural  
81 progenitors and neuronal populations (Brannvall *et al.*, 2002; Okada *et al.*, 2010; Denley *et al.*,  
82 2018). Furthermore, estradiol has recently been shown to regulate neurite outgrowth in  
83 immature cortical neurons derived from human induced pluripotent stem cells (Shum *et al.*,  
84 2015). Importantly, estrogen receptor-beta (ER $\beta$ ) knockout animals have been reported to  
85 display abnormal neuronal migration in the neocortex (Wang *et al.*, 2003). However,

86 whether the regulation of migration via ER $\beta$  is due to systemic or brain-synthesised  
87 estradiol is unclear. Similarly, whether estradiol influences neuronal migration in male and  
88 females is not known. Nevertheless, these lines of evidence indicate that estrogens play a  
89 role in during the development of the cortex.

90 Aromatase, the enzyme responsible for the conversion of androgens and cholesterol  
91 to estrogens, is expressed across species and is highly expressed during early  
92 development in both male and female cortices, suggesting a role for brain-synthesized  
93 estrogens during corticogenesis. Aromatase is believed to be the source of *de novo*  
94 estradiol synthesis in areas such as the hippocampus and cortex (MacLusky *et al.*, 1994;  
95 Saldanha *et al.*, 2011; Srivastava *et al.*, 2013; Lu *et al.*, 2019). We previously demonstrated  
96 that factors involved in estrogenic signalling, including aromatase, are present during the  
97 development of the human cortex (Denley *et al.*, 2018). In addition, aromatase-mediated  
98 estradiol signalling is required in fear-learning regulated by the basolateral amygdala and  
99 leads to sexually dimorphic plastic responses (Bender *et al.*, 2017). In the developing  
100 mammalian brain, supporting cells such as astrocytes and radial glial cells also express  
101 aromatase (Martinez-Cerdeno *et al.*, 2006; Yague *et al.*, 2006; Yague *et al.*, 2008). Studies  
102 in zebrafish demonstrated that radial glial cells expressing aromatase divide into neurons  
103 and that neural stem cells in the ventricular layer also express aromatase (Pellegrini *et al.*,  
104 2007). Taken together, these data provide strong evidence for a role for aromatase in  
105 differentiation and neurogenesis.

106 The purpose of this study was to investigate how the local synthesis of estrogens  
107 affects neurodevelopment of the cerebral cortex, and specifically the somatosensory cortex,  
108 and how this differs in males and females. Using an shRNA-approach, we knocked-down  
109 the *Cyp19a1* gene, which encodes aromatase, from an early developmental stage and

110 assessed the loss of aromatase, and thus the ability to locally synthesise estrogens had on  
111 neural migration. Analysis of neural migration revealed a sex specific effect of aromatase  
112 loss on neural migration. Taken together, these data contribute to the current evidence that  
113 brain-synthesised estrogens play a role in the development of the cortex, and moreover,  
114 add to the growing appreciation of sexually dimorphic niches in the brain.

115

## 116 **Materials and Methods**

### 117 ***Plasmid construction and shRNA validation***

118 Four shRNAs against *Mus musculus Cyp19a1* and one control scrambled shRNA  
119 were obtained from Origene (Rockville; Cat No. TG509276). These plasmids express both  
120 shRNA under the control of the U6 promoter and turboGFP under the control of a CMV  
121 promoter. A myc-DDK-tagged aromatase construct (pCMV6-myc-DDK-aromatase) was  
122 purchased from Origene (Rockville; Cat. No. MR224509); the pCAG-eGFP has previously  
123 been described (Srivastava *et al.*, 2012b). The effectiveness of each shRNA was validated  
124 by testing the ability of each construct to knockdown myc-aromatase expression in  
125 hEK293T cells. Briefly, hEK293 cells were grown to 40% confluency before transfection of  
126 myc-aromatase with or without shRNA constructs using Lipofectamine 2000  
127 (Lifetechnologies, UK). Transfections were allowed to proceed for 48 hours, after which  
128 cells were lysed and prepared for western blotting as previously described (Srivastava *et*  
129 *al.*, 2012a).

130

### 131 ***In utero electroporation***

132 *In utero* electroporation targeting the somatosensory cortex was performed according  
133 to previously published protocol (Niwa *et al.*, 2010; Saito *et al.*, 2016). All experiments were  
134 performed in accordance with the institutional guidelines for animal experiments. Embryos  
135 were electroporated at E14.5. Pregnant CD1 mice (obtained from Charles River) were  
136 anesthetized by intraperitoneal administration of a mixed solution of Ketamine HCl (100  
137 mg/kg), Xylazine HCl (7.5 mg/kg), and Buprenorphine HCl (0.05 mg/kg). The uterine sacs  
138 were exposed by laparotomy. In each pregnant animal, aromatase-shRNA, scramble-  
139 shRNA (1  $\mu\text{g}/\mu\text{l}$ ) or eGFP (0.5  $\mu\text{g}$ ) were injected into the left ventricle of the embryo with a  
140 glass micropipette made from a microcapillary tube (GD-1; Narishige). Control embryos  
141 were injected eGFP (1.0  $\mu\text{g}/\mu\text{l}$ ) into the right ventricle in the same manner. The head of the  
142 embryo was held between the electrodes (Nepagene) placed over the posterior forebrain  
143 with the positive electrode positioned above sight of injection. Electrode pulses (33V; 50  
144 ms) were charged four times at intervals of 950 ms with an electroporator (CUY21EDIT;  
145 Nepagene). After electroporation the uterine horn was replaced in the abdominal cavity to  
146 allow the embryos to continue to develop. A total of 6-15 embryos were electroporated in  
147 each of the 5 pregnant animals. Brains were extracted from P0 pups and assessed for GFP  
148 expression in correct location prior to fixation. Brains were fixed by overnight immersion in  
149 4% paraformaldehyde in 0.1 M phosphate buffer saline (PBS), and then  
150 cryoprotected/stored at 4°C in 30% sucrose in PBS.

151

## 152 **Genotyping**

153 Genomic DNA extracted from tail biopsies of postnatal day 0 mice (0.5 cm of tail  
154 removed from mice under anaesthesia) was analyzed using polymerase chain reaction. The  
155 tissue was digested overnight at 55°C in lysis buffer containing 100 mM Tris-HCl pH 8.5, 5

156 mM EDTA, 0.2% SDS, 200 mM NaCl, and 0.1 mg/ml proteinase K (Roche, Basel,  
157 Switzerland). Undigested material was removed by centrifugation. The pellet was re-  
158 suspended in nuclease-free water and the absorbance was measured using a NanoDrop  
159 ND1000 spectrophotometer (Nanodrop Technologies, Wilmington, DE, USA). Sex  
160 genotyping was performed using primers for Sry sex determining region of the Y-  
161 chromosome. Primers as follows: forward SRY Forward: TTG TCT AGA GAG CAT GGA  
162 GGG CCA TGT CAA, and reverse SRY Reverse: CCA CTC CTC TGT GAC ACT TTA GCC  
163 CTC CGA. These identify a 273 base pair PCR product. The PCR reagents as follows: 2.5  
164 µl 10× PCR buffer (Amersham Pharmacia Biotech); 0.2 mM dNTP mix; 0.25 µM forward  
165 and reverse primer set 1; 1 µM forward and reverse primer set 2; 0.625 U Taq DNA  
166 polymerase; and 2 µl DNA template (or 2 µl sterile PCR-grade H<sub>2</sub>O for PCR control  
167 sample); the volume was made up to 25 µl using sterile PCR-grade H<sub>2</sub>O. PCR was  
168 performed using a Peltier Thermal Cycler (PTC-200, MJ Research Inc., Watertown, MA)  
169 The resulting amplicons were resolved on 1.5% agarose gels and visualized using ethidium  
170 bromide staining with a GelDoc transilluminator (BioRad).

171

## 172 ***Immunohistochemistry (IHC)***

173 Brains were mounted in OCT embedding media (Bright) and cut into 14 µm sections  
174 across the coronal plane using a cryostat (Leica CM 1860 UV, Ag Protect) and collected on  
175 SuperFrost Plus microscope slides (Thermo Scientific). Immunohistochemistry (IHC) was  
176 carried out as previously described (Jones *et al.*, 2019). In brief, sections were  
177 simultaneously permeabilised and blocked in 0.1% Triton-X with 2% normal goat serum in  
178 PBS for 1 h at room temperature, in a humidified chamber. They were then incubated  
179 overnight at 4°C in a humidified chamber with primary antibodies against chicken GFP



180 (1:1000; Abcam #ab13970) and rabbit aromatase (1:100 Abcam #ab18995). Sections were  
181 then counterstained the appropriate secondary antibodies and counter stained with DAPI  
182 (ThermoFischer D1306). Images were captured and analyzed as described below.

183

#### 184 ***Image acquisition and data analysis***

185 Confocal images of IHC stained P0 sections was carried out using a Nikon Spinning  
186 Disk confocal equipped with either a 20X or 40X objective. Image z-stacks were acquired at  
187 z-intervals optimised for the specific objective. Images to be used for subsequent intensity-  
188 based analysis were acquired using identical acquisition parameters. For migration  
189 analysis, cortical sub-sections were identified by DAPI staining and regions of interest  
190 (ROIs) were identified in the 488 nm channel using the epifluorescence microscope. The  
191 effect of knockdown of aromatase on migration was analyzed by quantitative bin analysis  
192 according to previously published methods (Kubo *et al.*, 2010). In brief, the cortex was  
193 divided into ten equal sections (bins) and percentage of GFP<sup>+</sup> cells within each bin was  
194 determined. For each condition, a minimum of three images were collected over at least six  
195 section.

196 Analysis of aromatase expression was carried out on sections immunostained for  
197 aromatase and DAPI (endogenous aromatase expression) or immunostained for GFP,  
198 aromatase and DAPI (assessment of aromatase knockdown). ROIs were determined either  
199 as described above or limited to GFP<sup>+</sup> cells. Images were background subtracted, and the  
200 mean intensity of aromatase staining determined for five independent ROIs per image; three  
201 ROIs of background staining were also measured for each section. The mean intensity for  
202 each section was normalised to background staining (average of 3x background ROIs + 2x  
203 StDev). Between 3-4 sections per brain; 3 brains per condition was used for these analyses.

204

## 205 **Results**

### 206 ***Sex differences in aromatase expression but not in migration during cortex*** 207 ***development***

208 During human embryonic neocortical development, aromatase expression is  
209 transient but typically peaks during the last trimester and early postnatal period and then  
210 drops dramatically following embryonic maturity (Montelli *et al.*, 2012; Denley *et al.*, 2018).  
211 Similarly, estradiol has been measured in pre- and post-natal cortex of male and female rats  
212 (Konkle & McCarthy, 2011). Consistent with these findings, we found that aromatase was  
213 expressed in the developing cortex of mice (**Figure 1A**). In order to establish whether there  
214 was a sex difference in the expression of aromatase in the developing cortex, we examined  
215 expression of this enzyme in male and female P0 mice. Sex was established by the  
216 assessment of sex-determining region Y (*sry*) gene expression (**Figure 1B**). IHC analysis  
217 revealed aromatase positive cells in the SVZ/VZ, IZ and CP of male and female P0 mice  
218 (**Figure 1C**). Aromatase could be observed in the cell body (red arrows) as well as in  
219 dendrite-like processes (yellow arrow heads) of cells within the CP in both male and female  
220 P0 mice (**Figure 1D**). In line with previous studies (Montelli *et al.*, 2012), quantification of  
221 aromatase expression revealed that aromatase expression was higher in the developing  
222 cortex of male compared to female P0 mice (**Figure 1E**). Taken together, these data  
223 indicate that aromatase is expressed in the developing cortex of male and female mice,  
224 suggesting a potential role for brain-synthesised estrogens during this developmental time  
225 point.

226 As our data indicated that aromatase is more highly expressed in males compared to  
227 females, we reasoned that this may be reflected in a difference in neuronal migration

228 between sex. Therefore, to analyze the effect of sex on neuronal migration, we *in utero*  
229 electroporated embryos at E14.5 with a GFP expressing plasmid (pCAG-eGFP), and  
230 quantified the positions of GFP-positive (GFP+) cells in P0 brains as previously described  
231 (Kubo *et al.*, 2010). Sex were again determined by assessing expression of *sry*. Analysis of  
232 neuronal migration revealed that the differential expression of aromatase did not confer a  
233 difference in the migration of GFP+ cells in either sex under these control conditions  
234 (**Figure 2A**). This observation is confirmed by the relatively parity of GFP+ cells throughout  
235 the developing P0 cortex (**Figure 2B**). These data indicate that there are no differences in  
236 neuronal migration between male and female mice at P0.

237

### 238 ***Validation of aromatase knockdown***

239 Although our data indicates that there is no difference in neuronal migration between  
240 male and females under control conditions, previous studies using ER $\beta$  knockout animals  
241 have suggested a role for estradiol in cortical development (Wang *et al.*, 2003).  
242 Furthermore, estradiol has been shown to regulate proliferation and differentiation of neural  
243 progenitor cells (Denley *et al.*, 2018). Therefore, we were interested in understanding  
244 whether brain-synthesised estrogens may contribute to neuronal migration in either male or  
245 female mice. In order to do this, we employed a short hairpin RNA interference (shRNA)  
246 approach to selectively knockdown expression of *Cyp19a1*, the gene encoding aromatase.  
247 The efficiency of four individual shRNA to knockdown aromatase was first established in  
248 hEK203 cells. Myc-tagged aromatase was exogenous expressed in hEK293 cells in the  
249 presence of shRNA for aromatase or a control (scramble) shRNA (**Figure 3A**). Of the four  
250 shRNA tested shRNA\_c (herein referred to as shRNA\_ arom) reduced myc-aromatase  
251 expression by ~60% (**Figure 3A and B**) and was used in subsequent experiments.

252           Next, we assessed whether expression of shRNA\_ arom in the developing cortex by  
253 *in utero* electroporation resulted in a significant knockdown of aromatase in males and  
254 females. Embryos were electroporated with shRNA\_ arom expression construct or control  
255 shRNA (shRNA\_ scram) at E14.5 (**Figure 3 C and D**). Corrected integrated intensity  
256 measurements from confocal images taken of the P0 mouse cortex confirmed that  
257 shRNA\_ arom effectively reduced aromatase expression by approximately 50% compared to  
258 control condition in both sexes (**Figure 3C-E**). These data confirm the efficacy of aromatase  
259 knockdown by shRNA *in vivo*.

260

### 261 ***Aromatase knockdown affects cortical migration divergently in male and females***

262           To determine whether brain-synthesised estrogens play a role in the migration of  
263 neocortical cells, we assessed distribution of GFP+ cells in control and aromatase  
264 knockdown conditions (**Figure 4**). In P0 male mice, knockdown of aromatase resulted in an  
265 increase of GFP+ cells within the upper most portion of the CP with a concurrent reduction  
266 of GFP+ cells within the SVZ/VZ (**Figure 4 A and B**). Conversely, the opposite distribution  
267 was observed in the shRNA\_ arom condition in females; a decreased number of GFP+ was  
268 observed in the CP, where as an increase was detected in the SVZ/VZ (**Figure 4C and D**).  
269 Taken together, these data indicate that that knockdown of aromatase may accelerate  
270 radial neuronal migration in male, whereas migration is impaired in the female developing  
271 cortex.

272

### 273 **Discussion**

274 Aromatase is expressed in specific brain regions, where it controls the bioavailability  
275 of brain-synthesized estradiol within female and male brains (Saldanha *et al.*, 2011;  
276 Srivastava *et al.*, 2013; Lu *et al.*, 2019). Moreover, estradiol is present at significant levels in  
277 the brain of both sexes, including the developing cortex (MacLusky *et al.*, 1986; MacLusky  
278 *et al.*, 1994; Konkle & McCarthy, 2011). However, the functions of brain-synthesized  
279 estradiol during early corticogenesis development are unclear (Denley *et al.*, 2018). Here,  
280 we demonstrated that aromatase is widely expressed within the developing cortex of  
281 perinatal female and male mice. Aromatase expression was higher in males compared with  
282 females across the different laminae of the developing cortex. Interestingly, there were no  
283 differences in the pattern of migration in female and male cortices at P0. We used a  
284 knockdown approach to suppress endogenous *Cyp19a1* and thus aromatase expression in  
285 a subset of cortical progenitor cells destined to migrate to layer 2/3. Knockdown of  
286 aromatase had opposing effects on the migration of cortical progenitor cells in female and  
287 male developing brains. Specifically, loss of *aromatase* resulted in an increase of GFP+  
288 cells in the CP with a concurrent decrease in the SVZ/VZ, indicating a potential increase in  
289 radial migration. Conversely, knockdown of aromatase in female mice resulted in a  
290 significantly decreased number of GFP+ cells in the upper layers of the developing cortex  
291 and an accumulation of cells within the SVZ/VZ, indicating a potential decrease in neuronal  
292 migration. Taken together, our data indicate that whilst there is no obvious difference in  
293 migration between male and females under control conditions, the influence of brain-  
294 synthesized estradiol on radial migration is sexually divergent and potentially involves the  
295 regulation of distinct mechanism in either sex.

296 The data presented in this study are consistent with a purported role for brain-  
297 synthesized estradiol in the development of the mammalian forebrain. Previous studies

298 have demonstrated that high levels of aromatase are expressed in multiple regions of the  
299 brain, including the cortex (Beyer *et al.*, 1994; Yague *et al.*, 2008; Cisternas *et al.*, 2015).  
300 Importantly, the current results are consistent with this, but they further highlight that that  
301 there is greater expression of aromatase in the male developing cortex compared with  
302 females at the protein level. Although previous work implicated ER $\beta$  knockdown in the  
303 development of the cortex (Wang *et al.*, 2003), the current study provides evidence that  
304 brain-synthesised estradiol regulates neuronal migration in the developing cortex of both  
305 female and male mice. Whether systemic estradiol also impacts neuronal migration is  
306 unclear from these studies and would need to be studied further in the future.

307 A striking finding of this study is that the effect of *aromatase* knockdown on neuronal  
308 migration in the developing cortex is opposing in female and male mice. There are two  
309 possible explanations for this observation. First, estradiol could be exerting multiple effects  
310 on progenitor cells, such as controlling cell proliferation and/or apoptosis, as reported  
311 previously in the hypothalamus (Denley *et al.*, 2018; McCarthy *et al.*, 2018). Second,  
312 estradiol could be modulating the migration of newly born neurons in both sexes. No  
313 differences in the number of GFP+ cells were found under different conditions and between  
314 sex (data not shown), which indicates that the changes observed were due to different  
315 localization of the labelled cells rather than increases or decreases in the overall number of  
316 cells. Thus, these effects are more likely an effect on the migration (or lack thereof) of newly  
317 born neurons. The small GTPase Rap1 mediates the migration, polarity, and establishment  
318 of neuronal morphology (Jossin & Cooper, 2011; Srivastava *et al.*, 2012b). Since we  
319 previously demonstrated that estradiol controls Rap1 activity in maturing cortical neurons  
320 (Srivastava *et al.*, 2008), it is possible that brain-synthesized estradiol mediates migration  
321 via a Rap1-dependent mechanism. It is also important to note that although knockdown

322 approach using *in utero* electroporation allows us to examine the cell-autonomous effect of  
323 aromatase in the specific time critical for radial neuronal migration. However, we should be  
324 cautious in data interpretation, as off-target effect of shRNA may be confounded in the  
325 results. Thus, it is important to investigate the effect of aromatase(*Cyp19a1*)-  
326 haploinsufficiency in mouse models to elucidate aromatase-mediated mechanisms  
327 underpinning developmental phenotypes such as neuronal migration in the future.

328         The development of the cortex is fundamental for normal brain function. Interestingly,  
329 multiple animal models for autism spectrum disorders aimed at understanding the  
330 contribution of genetic and/or environmental risk factors to the underlying pathophysiology  
331 of this disorder have revealed that disruptions in early brain development is prevalent in  
332 these models. In particular, abnormalities in the development, migration, and organization of  
333 the developing cortex have been reported (Fenlon *et al.*, 2015; Varghese *et al.*, 2017).  
334 Moreover, there is accumulating evidence that elevated levels of fetal steroids, especially  
335 testosterone (Baron-Cohen *et al.*, 2015; McCarthy & Wright, 2017), are linked with autism  
336 spectrum disorders. Furthermore, rare mutations in the *CYP191A* gene have been reported  
337 in autistic patients and reduced ER $\beta$  and aromatase expression has been measured in  
338 autistic post-mortem tissue (Chakrabarti *et al.*, 2009; Sarachana *et al.*, 2011; Crider *et al.*,  
339 2014). These lines of evidence have led to suggestions that altered steroidogenic activity  
340 and/or elevated levels of fetal testosterone could contribute to the pathophysiology of  
341 autism. It should be noted that knocking down *Cyp19a1* will both reduce estradiol levels and  
342 likely increase the levels of testosterone and other androgens within the developing cortex  
343 of these animals. Therefore, the current study may not only provide an insight into how  
344 reduced brain-synthesised estradiol levels impact development of the cortex, but also the  
345 impact of elevated levels of fetal testosterone on corticogenesis and therefore how

346 dysregulation of fetal steroids could contribute to the emergence of neurodevelopmental  
347 disorders such as autism spectrum disorders.

348 In conclusion, the current study revealed that aromatase is expressed in the  
349 developing cortex of both female and male mice, and at higher levels in males than  
350 females. Knockdown of aromatase in cortical progenitor cells destined to migrate to layer  
351 2/3, had marked sex-specific effects. Future studies focusing on understanding the  
352 mechanism underlying these effects, including investigating the potential role of Rap1, and  
353 also identifying the receptors that are responsible for the actions of the brain-synthesized  
354 estrogens (i.e., do brain-synthesized estradiols function via the classical “genomic” mode of  
355 action or do they act via a “membrane initiated” mode of action) are required. Together with  
356 the current work, these studies will help reveal the potential role of fetal steroids in normal  
357 development and how perturbations in this system may contribute to the emergence of  
358 disease.

359

### 360 **Conflict of Interest**

361 The authors declare that the research was conducted in the absence of any commercial or  
362 financial relationships that could be construed as a potential conflict of interest.

363

### 364 **Author Contributions**

365 K.J.S., A.S., A.K. and D.P.S. designed experiments. K.J.S. M.C.S.D., A.S. and D.P.S.  
366 performed all experiments and subsequent analysis. D.P.S. oversaw the study; K.J.S.  
367 M.C.S.D., and D.P.S. wrote the manuscript; all authors edited manuscript drafts.



368

## 369 **Funding**

370 This work was supported by grants from Medical Research Council, MR/L021064/1, Royal  
371 Society UK (Grant RG130856), the Brain and Behavior Foundation (formally National  
372 Alliance for Research on Schizophrenia and Depression (NARSAD); Grant No. 25957),  
373 awarded to D.P.S.; NIH grants R01DA041208 (A.K.), P50MH094268 (A.K.), Catalyst award  
374 (A.K.), and Brain & Behavior Research Foundation (A.K., A.S.); K.J.S. was supported by a  
375 McGregor Fellowship from the Psychiatric Research Trust (Grant McGregor 97) awarded to  
376 D.P.S.; K.J.S. is the recipient of an Institute of Psychiatry, Psychology and Neuroscience,  
377 Independent Researcher Early Career Award.

378

379

## 380 **References**

381 Allen, L.S. & Gorski, R.A. (1991) Sexual dimorphism of the anterior commissure and massa  
382 intermedia of the human brain. *J Comp Neurol*, **312**, 97-104.

383

384 Balthazart, J. & Ball, G.F. (2006) Is brain estradiol a hormone or a neurotransmitter? *Trends*  
385 *Neurosci*, **29**, 241-249.

386

387 Bangasser, D.A. & Shors, T.J. (2007) The hippocampus is necessary for enhancements  
388 and impairments of learning following stress. *Nat Neurosci*, **10**, 1401-1403.

389

390 Baron-Cohen, S., Auyeung, B., Norgaard-Pedersen, B., Hougaard, D.M., Abdallah, M.W.,  
391 Melgaard, L., Cohen, A.S., Chakrabarti, B., Ruta, L. & Lombardo, M.V. (2015)  
392 Elevated fetal steroidogenic activity in autism. *Mol Psychiatry*, **20**, 369-376.

393

394 Bender, R.A., Zhou, L., Vierk, R., Brandt, N., Keller, A., Gee, C.E., Schafer, M.K. & Rune,  
395 G.M. (2017) Sex-Dependent Regulation of Aromatase-Mediated Synaptic Plasticity in  
396 the Basolateral Amygdala. *J Neurosci*, **37**, 1532-1545.

397

398 Beyer, C., Green, S.J., Barker, P.J., Huskisson, N.S. & Hutchison, J.B. (1994) Aromatase-  
399 immunoreactivity is localised specifically in neurones in the developing mouse  
400 hypothalamus and cortex. *Brain Res*, **638**, 203-210.

401

402 Brannvall, K., Korhonen, L. & Lindholm, D. (2002) Estrogen-receptor-dependent regulation  
403 of neural stem cell proliferation and differentiation. *Mol Cell Neurosci*, **21**, 512-520.

404

405 Chakrabarti, B., Dudbridge, F., Kent, L., Wheelwright, S., Hill-Cawthorne, G., Allison, C.,  
406 Banerjee-Basu, S. & Baron-Cohen, S. (2009) Genes related to sex steroids, neural  
407 growth, and social-emotional behavior are associated with autistic traits, empathy,  
408 and Asperger syndrome. *Autism Res*, **2**, 157-177.

409

410 Choleric, E., Galea, L.A.M., Sohrabji, F. & Frick, K.M. (2018) Sex differences in the brain:  
411 Implications for behavioral and biomedical research. *Neurosci Biobehav Rev*, **85**,  
412 126-145.

413

414 Cisternas, C.D., Tome, K., Caeiro, X.E., Dadam, F.M., Garcia-Segura, L.M. & Cambiasso,  
415 M.J. (2015) Sex chromosome complement determines sex differences in aromatase  
416 expression and regulation in the stria terminalis and anterior amygdala of the  
417 developing mouse brain. *Mol Cell Endocrinol*, **414**, 99-110.

418

419 Crider, A., Thakkar, R., Ahmed, A.O. & Pillai, A. (2014) Dysregulation of estrogen receptor  
420 beta (ER $\beta$ ), aromatase (CYP19A1), and ER co-activators in the middle frontal gyrus  
421 of autism spectrum disorder subjects. *Molecular Autism*, **5**, 46.

422

423 Denley, M.C.S., Gatford, N.J.F., Sellers, K.J. & Srivastava, D.P. (2018) Estradiol and the  
424 Development of the Cerebral Cortex: An Unexpected Role? *Front Neurosci*, **12**, 245.

425

426 Evsyukova, I., Plestant, C. & Anton, E.S. (2013) Integrative mechanisms of oriented  
427 neuronal migration in the developing brain. *Annu Rev Cell Dev Biol*, **29**, 299-353.

428

429 Fenlon, L.R., Liu, S., Gobijs, I., Kurniawan, N.D., Murphy, S., Moldrich, R.X. & Richards,  
430 L.J. (2015) Formation of functional areas in the cerebral cortex is disrupted in a  
431 mouse model of autism spectrum disorder. *Neural Dev*, **10**, 10.

432

433 Garcia-Falgueras, A. & Swaab, D.F. (2008) A sex difference in the hypothalamic uncinate  
434 nucleus: relationship to gender identity. *Brain*, **131**, 3132-3146.

435

436 Gillies, G.E. & McArthur, S. (2010) Estrogen actions in the brain and the basis for  
437 differential action in men and women: a case for sex-specific medicines. *Pharmacol*  
438 *Rev*, **62**, 155-198.

439

440 Jones, K.A., Sumiya, M., Woolfrey, K.M., Srivastava, D.P. & Penzes, P. (2019) Loss of  
441 EPAC2 alters dendritic spine morphology and inhibitory synapse density. *Mol Cell*  
442 *Neurosci*, **98**, 19-31.

443

444 Jossin, Y. & Cooper, J.A. (2011) Reelin, Rap1 and N-cadherin orient the migration of  
445 multipolar neurons in the developing neocortex. *Nat Neurosci*, **14**, 697-703.

446

447 Kaczurkin, A.N., Raznahan, A. & Satterthwaite, T.D. (2019) Sex differences in the  
448 developing brain: insights from multimodal neuroimaging.  
449 *Neuropsychopharmacology*, **44**, 71-85.

450

451 Kawauchi, T. (2015) Cellular insights into cerebral cortical development: focusing on the  
452 locomotion mode of neuronal migration. *Front Cell Neurosci*, **9**, 394.

453

454 Konkle, A.T. & McCarthy, M.M. (2011) Developmental time course of estradiol,  
455 testosterone, and dihydrotestosterone levels in discrete regions of male and female  
456 rat brain. *Endocrinology*, **152**, 223-235.

457

458 Kubo, K., Tomita, K., Uto, A., Kuroda, K., Seshadri, S., Cohen, J., Kaibuchi, K., Kamiya, A.  
459 & Nakajima, K. (2010) Migration defects by DISC1 knockdown in C57BL/6,  
460 129X1/SvJ, and ICR strains via in utero gene transfer and virus-mediated RNAi.  
461 *Biochem Biophys Res Commun*, **400**, 631-637.

462

463 Lenroot, R.K., Gogtay, N., Greenstein, D.K., Wells, E.M., Wallace, G.L., Clasen, L.S.,  
464 Blumenthal, J.D., Lerch, J., Zijdenbos, A.P., Evans, A.C., Thompson, P.M. & Giedd,  
465 J.N. (2007) Sexual dimorphism of brain developmental trajectories during childhood  
466 and adolescence. *Neuroimage*, **36**, 1065-1073.

467

468 Lu, Y., Sareddy, G.R., Wang, J., Wang, R., Li, Y., Dong, Y., Zhang, Q., Liu, J., O'Connor,  
469 J.C., Xu, J., Vadlamudi, R.K. & Brann, D.W. (2019) Neuron-Derived Estrogen  
470 Regulates Synaptic Plasticity and Memory. *J Neurosci*, **39**, 2792-2809.

471

472 MacLusky, N.J., Naftolin, F. & Goldman-Rakic, P.S. (1986) Estrogen formation and binding  
473 in the cerebral cortex of the developing rhesus monkey. *Proc Natl Acad Sci U S A*,  
474 **83**, 513-516.

475

476 MacLusky, N.J., Walters, M.J., Clark, A.S. & Toran-Allerand, C.D. (1994) Aromatase in the  
477 cerebral cortex, hippocampus, and mid-brain: ontogeny and developmental  
478 implications. *Mol Cell Neurosci*, **5**, 691-698.

479

480 Maeng, L.Y., Waddell, J. & Shors, T.J. (2010) The prefrontal cortex communicates with the  
481 amygdala to impair learning after acute stress in females but not in males. *J*  
482 *Neurosci*, **30**, 16188-16196.

483

484 Martinez-Cerdeno, V., Noctor, S.C. & Kriegstein, A.R. (2006) Estradiol stimulates progenitor  
485 cell division in the ventricular and subventricular zones of the embryonic neocortex.  
486 *Eur J Neurosci*, **24**, 3475-3488.

487

488 McCarthy, M.M., Herold, K. & Stockman, S.L. (2018) Fast, furious and enduring: Sensitive  
489 versus critical periods in sexual differentiation of the brain. *Physiol Behav*, **187**, 13-  
490 19.

491

492 McCarthy, M.M. & Wright, C.L. (2017) Convergence of Sex Differences and the  
493 Neuroimmune System in Autism Spectrum Disorder. *Biol Psychiatry*, **81**, 402-410.

494

495 Montelli, S., Peruffo, A., Zambenedetti, P., Rossipal, E., Giacomello, M., Zatta, P. & Cozzi,  
496 B. (2012) Expression of aromatase P450(AROM) in the human fetal and early  
497 postnatal cerebral cortex. *Brain Res*, **1475**, 11-18.

498

499 Niwa, M., Kamiya, A., Murai, R., Kubo, K., Gruber, A.J., Tomita, K., Lu, L., Tomisato, S.,  
500 Jaaro-Peled, H., Seshadri, S., Hiyama, H., Huang, B., Kohda, K., Noda, Y.,  
501 O'Donnell, P., Nakajima, K., Sawa, A. & Nabeshima, T. (2010) Knockdown of DISC1  
502 by in utero gene transfer disturbs postnatal dopaminergic maturation in the frontal  
503 cortex and leads to adult behavioral deficits. *Neuron*, **65**, 480-489.

504

505 Noctor, S.C., Martinez-Cerdeno, V., Ivic, L. & Kriegstein, A.R. (2004) Cortical neurons arise  
506 in symmetric and asymmetric division zones and migrate through specific phases.  
507 *Nat Neurosci*, **7**, 136-144.

508

509 Okada, M., Makino, A., Nakajima, M., Okuyama, S., Furukawa, S. & Furukawa, Y. (2010)  
510 Estrogen stimulates proliferation and differentiation of neural stem/progenitor cells  
511 through different signal transduction pathways. *Int J Mol Sci*, **11**, 4114-4123.

512

- 513 Oliveira-Pinto, A.V., Santos, R.M., Coutinho, R.A., Oliveira, L.M., Santos, G.B., Alho, A.T.,  
514 Leite, R.E., Farfel, J.M., Suemoto, C.K., Grinberg, L.T., Pasqualucci, C.A., Jacob-  
515 Filho, W. & Lent, R. (2014) Sexual dimorphism in the human olfactory bulb: females  
516 have more neurons and glial cells than males. *PLoS One*, **9**, e111733.
- 517
- 518 Pellegrini, E., Mouriec, K., Anglade, I., Menuet, A., Le Page, Y., Gueguen, M.M.,  
519 Marmignon, M.H., Brion, F., Pakdel, F. & Kah, O. (2007) Identification of aromatase-  
520 positive radial glial cells as progenitor cells in the ventricular layer of the forebrain in  
521 zebrafish. *J Comp Neurol*, **501**, 150-167.
- 522
- 523 Saito, A., Taniguchi, Y., Rannals, M.D., Merfeld, E.B., Ballinger, M.D., Koga, M., Ohtani, Y.,  
524 Gurley, D.A., Sedlak, T.W., Cross, A., Moss, S.J., Brandon, N.J., Maher, B.J. &  
525 Kamiya, A. (2016) Early postnatal GABAA receptor modulation reverses deficits in  
526 neuronal maturation in a conditional neurodevelopmental mouse model of DISC1.  
527 *Mol Psychiatry*, **21**, 1449-1459.
- 528
- 529 Saldanha, C.J., Ramage-Healey, L. & Schlinger, B.A. (2011) Synaptocrine signaling: steroid  
530 synthesis and action at the synapse. *Endocr Rev*, **32**, 532-549.
- 531
- 532 Sarachana, T., Xu, M., Wu, R.C. & Hu, V.W. (2011) Sex hormones in autism: androgens  
533 and estrogens differentially and reciprocally regulate RORA, a novel candidate gene  
534 for autism. *PLoS One*, **6**, e17116.



535

536 Savic, I., Garcia-Falgueras, A. & Swaab, D.F. (2010) Sexual differentiation of the human  
537 brain in relation to gender identity and sexual orientation. *Prog Brain Res*, **186**, 41-  
538 62.

539

540 Sellers, K., Raval, P. & Srivastava, D.P. (2015a) Molecular signature of rapid estrogen  
541 regulation of synaptic connectivity and cognition. *Front Neuroendocrinol*, **36**, 72-89.

542

543 Sellers, K.J., Erli, F., Raval, P., Watson, I.A., Chen, D. & Srivastava, D.P. (2015b) Rapid  
544 modulation of synaptogenesis and spinogenesis by 17beta-estradiol in primary  
545 cortical neurons. *Front Cell Neurosci*, **9**, 137.

546

547 Shum, C., Macedo, S.C., Warre-Cornish, K., Cocks, G., Price, J. & Srivastava, D.P. (2015)  
548 Utilizing induced pluripotent stem cells (iPSCs) to understand the actions of  
549 estrogens in human neurons. *Horm Behav*, **74**, 228-242.

550

551 Srivastava, D.P., Jones, K.A., Woolfrey, K.M., Burgdorf, J., Russell, T.A., Kalmbach, A.,  
552 Lee, H., Yang, C., Bradberry, M.M., Wokosin, D., Moskal, J.R., Casanova, M.F.,  
553 Waters, J. & Penzes, P. (2012a) Social, communication, and cortical structural  
554 impairments in Epac2-deficient mice. *J Neurosci*, **32**, 11864-11878.

555

556 Srivastava, D.P., Woolfrey, K.M., Jones, K.A., Anderson, C.T., Smith, K.R., Russell, T.A.,  
557 Lee, H., Yasvoina, M.V., Wokosin, D.L., Ozdinler, P.H., Shepherd, G.M. & Penzes,  
558 P. (2012b) An autism-associated variant of Epac2 reveals a role for Ras/Epac2  
559 signaling in controlling basal dendrite maintenance in mice. *PLoS Biol*, **10**,  
560 e1001350.

561

562 Srivastava, D.P., Woolfrey, K.M., Jones, K.A., Shum, C.Y., Lash, L.L., Swanson, G.T. &  
563 Penzes, P. (2008) Rapid enhancement of two-step wiring plasticity by estrogen and  
564 NMDA receptor activity. *Proc Natl Acad Sci U S A*, **105**, 14650-14655.

565

566 Srivastava, D.P., Woolfrey, K.M. & Penzes, P. (2013) Insights into rapid modulation of  
567 neuroplasticity by brain estrogens. *Pharmacol Rev*, **65**, 1318-1350.

568

569 Varghese, M., Keshav, N., Jacot-Descombes, S., Warda, T., Wicinski, B., Dickstein, D.L.,  
570 Harony-Nicolas, H., De Rubeis, S., Drapeau, E., Buxbaum, J.D. & Hof, P.R. (2017)  
571 Autism spectrum disorder: neuropathology and animal models. *Acta Neuropathol*,  
572 **134**, 537-566.

573

574 Waddell, J., Bangasser, D.A. & Shors, T.J. (2008) The basolateral nucleus of the amygdala  
575 is necessary to induce the opposing effects of stressful experience on learning in  
576 males and females. *J Neurosci*, **28**, 5290-5294.

577

578 Wang, L., Andersson, S., Warner, M. & Gustafsson, J.A. (2003) Estrogen receptor (ER)beta  
579 knockout mice reveal a role for ERbeta in migration of cortical neurons in the  
580 developing brain. *Proc Natl Acad Sci U S A*, **100**, 703-708.

581

582 Yague, J.G., Munoz, A., de Monasterio-Schrader, P., Defelipe, J., Garcia-Segura, L.M. &  
583 Azcoitia, I. (2006) Aromatase expression in the human temporal cortex.  
584 *Neuroscience*, **138**, 389-401.

585

586 Yague, J.G., Wang, A.C., Janssen, W.G., Hof, P.R., Garcia-Segura, L.M., Azcoitia, I. &  
587 Morrison, J.H. (2008) Aromatase distribution in the monkey temporal neocortex and  
588 hippocampus. *Brain Res*, **1209**, 115-127.

589

590

## 591 **Figure Legends**

592

593 **Figure 1. Aromatase is differentially expressed in the developing female and male**  
594 **cortex. (A)** Western blot of lysates taken from developing cortex demonstrating aromatase  
595 expression at different stages of development. **(B)** Representative RT-PCR analysis for *sry*  
596 gene used to determine sex of P0 animals used in subsequent analysis. **(C)** Representative  
597 confocal image of aromatase staining in P0 cortex of female and male. Aromatase positive  
598 cells can be observed in the SVZ/VZ, IZ and CP in both female and male developing cortex.

599 Yellow dotted boxes indicate high magnification images shown in D. **(D)** High magnification  
600 images from C. Red arrows indicate aromatase positive immunoreactivity within cell body of  
601 developing neurons in either female or male P0 cortex. Yellow arrow heads indicate  
602 aromatase expression within processes of developing neurons in P0 cortex of both sexes.  
603 **(E)** Quantification of relative aromatase expression throughout P0 cortex of female and  
604 male. This revealed that males have a significantly higher expression of aromatase at this  
605 stage of development within the cortex. Conditions were compared by Student's t test;  
606 \*\*P<0.001; n=13-15 sections from 8 pups/sex. Data are presented as Box and Whisker  
607 plots with error bars showing minimum and maximum data points; each data point  
608 represents an individual section. Scale bars = 100  $\mu$ m (C) and 20  $\mu$ m (D).

609

610 **Figure 2. Neuronal migration does not differ between female and male in the**  
611 **developing cortex. (A)** Representative confocal images of P0 cortex of female and males  
612 demonstrating the distribution of GFP+ cells. **(B)** Quantification of GFP+ cells throughout  
613 the developing cortex. This revealed that there was a similar distribution of GFP+ positive  
614 cells the P0 cortex of female and male mice. Scale bar = 50  $\mu$ m.

615

616 **Figure 3. Optimization of *Cyp19a1* knockdown *in vivo*. (A)** Western blot of cell lysates  
617 taken from hEK293 cells expressing myc-aromatase in the presence or absence of shRNA  
618 against *Cyp19a1* (shRNA<sub>a-d</sub>) or a control construct (shRNA<sub>scram</sub>). **(B)** Quantification of  
619 myc-aromatase expression reveals that shRNA<sub>c</sub> (aka shRNA<sub>arom</sub>) produced ~60%  
620 knockdown of exogenous aromatase. Conditions were compared by one-way ANOVA;  
621 F(5,12)=7.077, p=0.003, Tukey Post Hoc, \*, p < 0.05; n = 3 independent cultures. Data are

622 presented as Box and Whisker plots with error bars showing minimum and maximum data  
623 points; each data point represents an individual experiment. **(C and D)** Representative  
624 confocal images of female (C) or male (D) P0 cortex *in utero* electroporated at E14.5 with  
625 either control (shRNA\_scram) or shRNA\_ arom and co-stained for aromatase and GFP.  
626 GFP was used to identify cells expressing control or *Cyp19a1* shRNA. **(E)** Quantification of  
627 aromatase expression in GFP+ cells in control or shRNA\_ arom conditions in female or male  
628 P0 cortex. This revealed that shRNA- arom reduced endogenous aromatase expression by  
629 ~ 50% in both sexes. Data are represented as a percentage of control condition. Conditions  
630 were compared by two-way ANOVA;  $F(1,18)=95.59$ ,  $p<0.0001$ , Bonferroni Post Hoc, \*\*\*,  $p$   
631  $< 0.001$ ;  $n=8-12$  sections from 4-6 pups/sex. Each data point represents an individual  
632 section. Scale bars = 20  $\mu\text{m}$ .

633

634 **Figure 4. Loss of aromatase in developing cortex has divergent effects on neuronal**  
635 **migration in female and male cortex. (A)** Representative confocal images of female P0  
636 cortex *in utero* electroporated at E14.5 with either control (shRNA\_scram) or shRNA\_ arom  
637 and stained for GFP. **(B)** Quantification of GFP+ cells distribution throughout the developing  
638 female cortex. In conditions where *Cyp19a1* had been knockdown (shRNA\_ arom), a  
639 significant more GFP+ cells were observed in the lowest bin, equating to the SVZ/VZ of the  
640 P0 cortex. Concurrently, a decrease in the number of GFP+ cells was measured in the  
641 upper most bins, equating to the upper portion of the CP. Conditions were compared by  
642 two-way ANOVA;  $F(9,140)=5.873$ ,  $p<0.0001$ , Bonferroni Post Hoc, \*\*,  $p<0.01$ , \*\*\*,  $p <$   
643  $0.001$ ;  $n=10-12$  sections from 6-8 pups/condition/sex. **(C)** Representative confocal images  
644 of male P0 cortex *in utero* electroporated at E14.5 with either control (shRNA\_scram) or  
645 shRNA\_ arom and stained for GFP. **(D)** Quantification of GFP+ cells distribution throughout

646 the developing male cortex. Loss of aromatase induced by *Cyp19a1* knockdown  
647 (shRNA\_ arom) resulted in a significant increase of GFP+ cells in the upper portion of the  
648 CP. Congruent with this, a decrease in GFP+ cells was observed in the SVZ/VZ of the P0  
649 male cortex. Conditions were compared by two-way ANOVA;  $F(9,160)=10.08$ ,  $p<0.0001$ ,  
650 Bonferroni Post Hoc, \*,  $p<0.05$ , \*\*\*,  $p < 0.001$ ;  $n=7-11$  sections from 5-7 pups/condition/sex.  
651 Scale bars = 50  $\mu\text{m}$ .

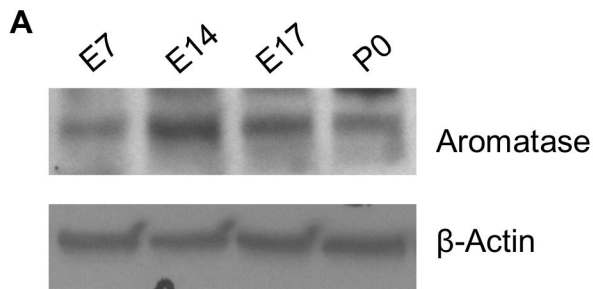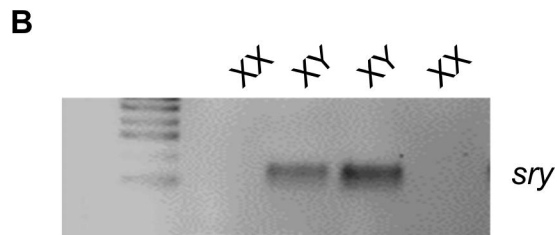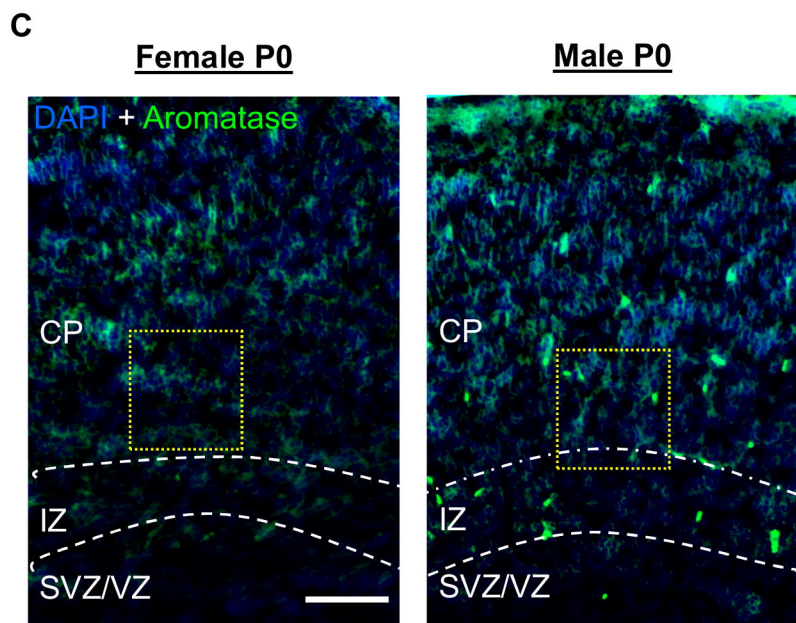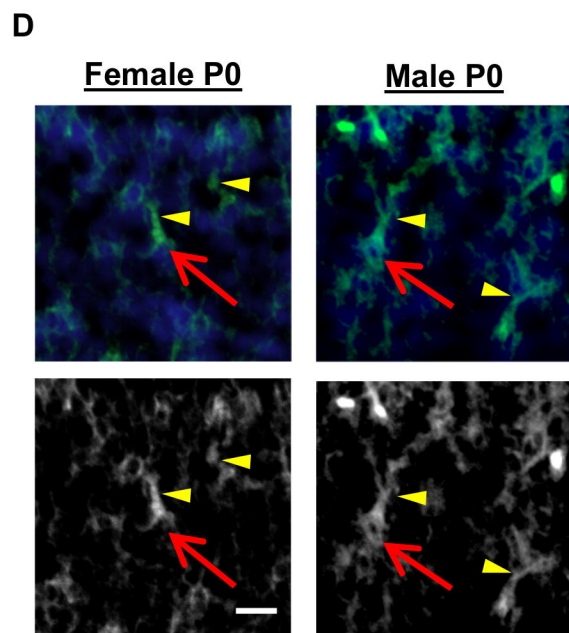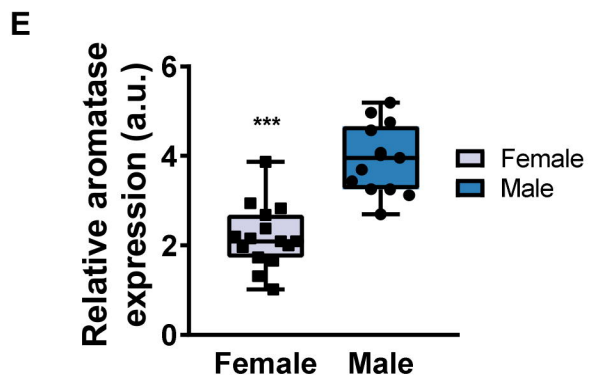

A

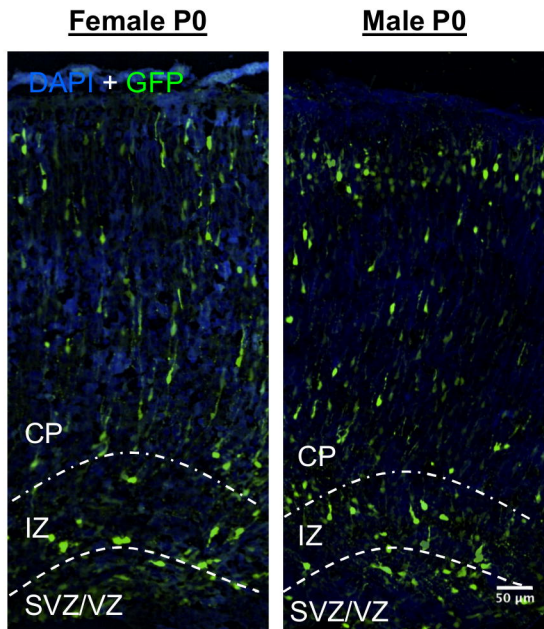

B

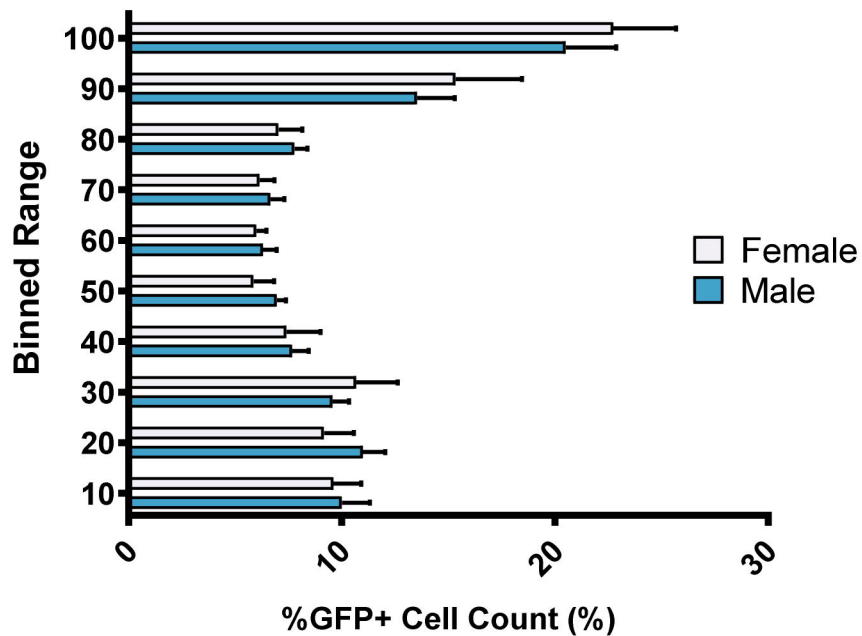



**A**

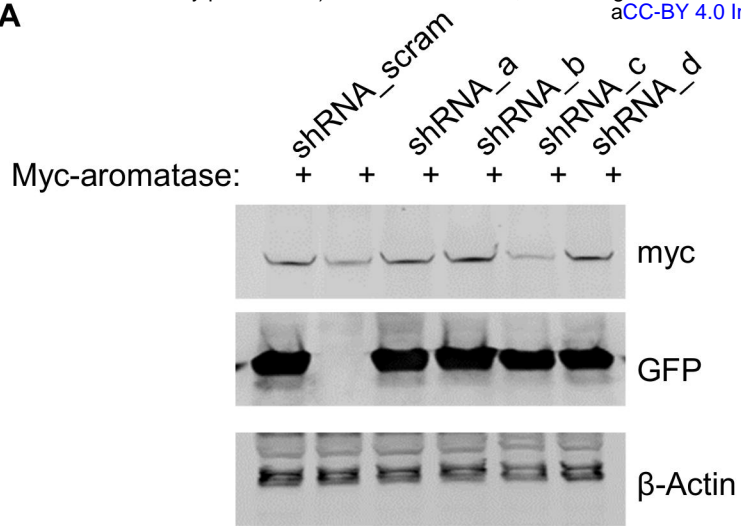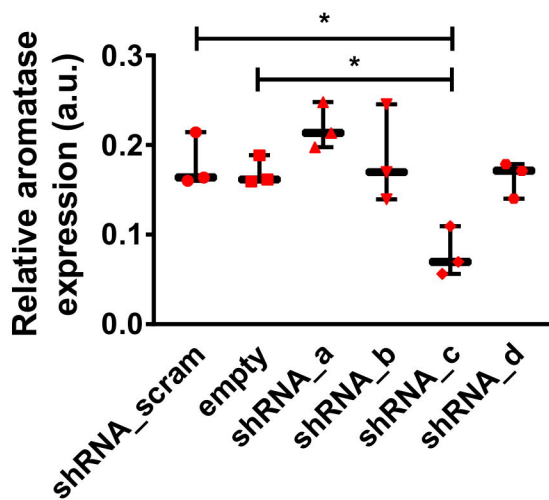

**C**

**Female P0**

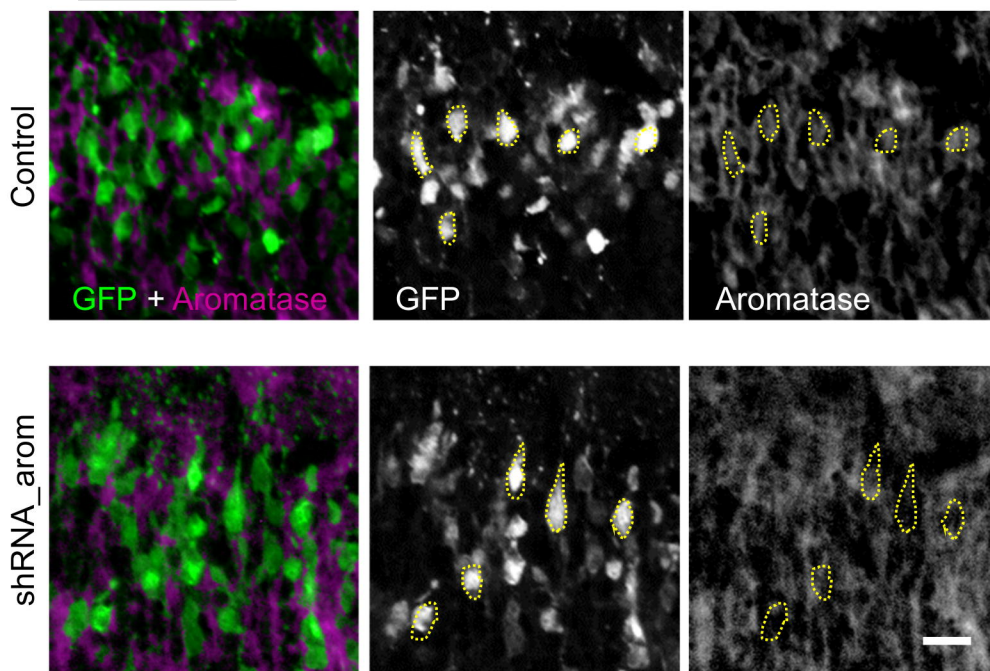

**E**

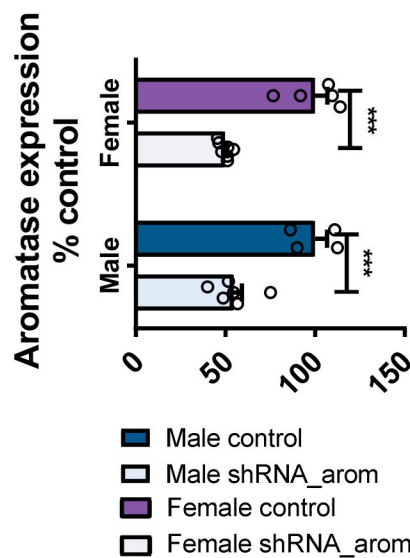

**D**

**Male P0**

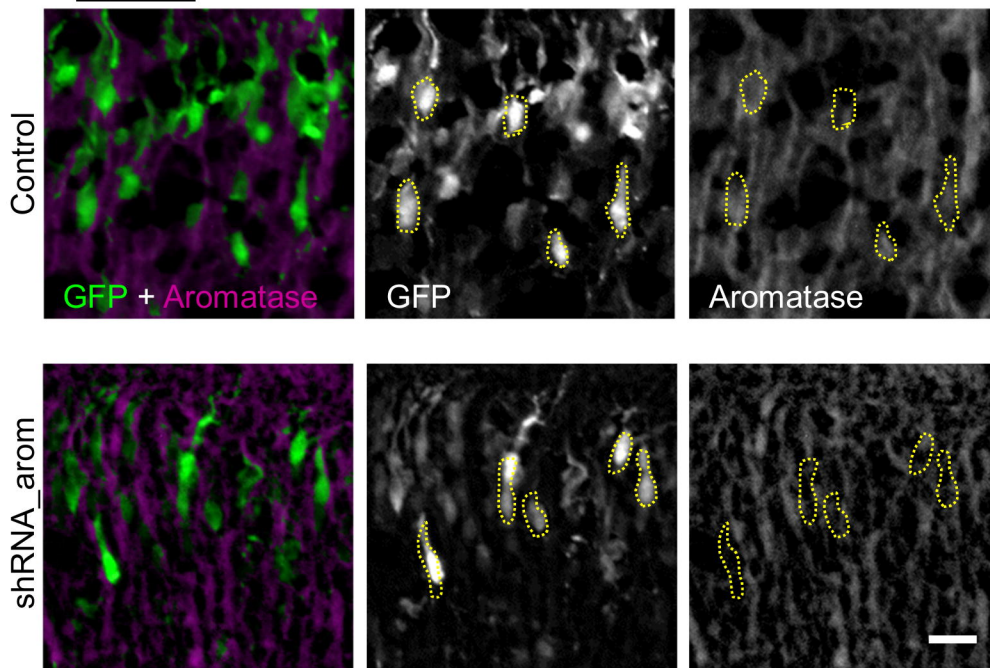

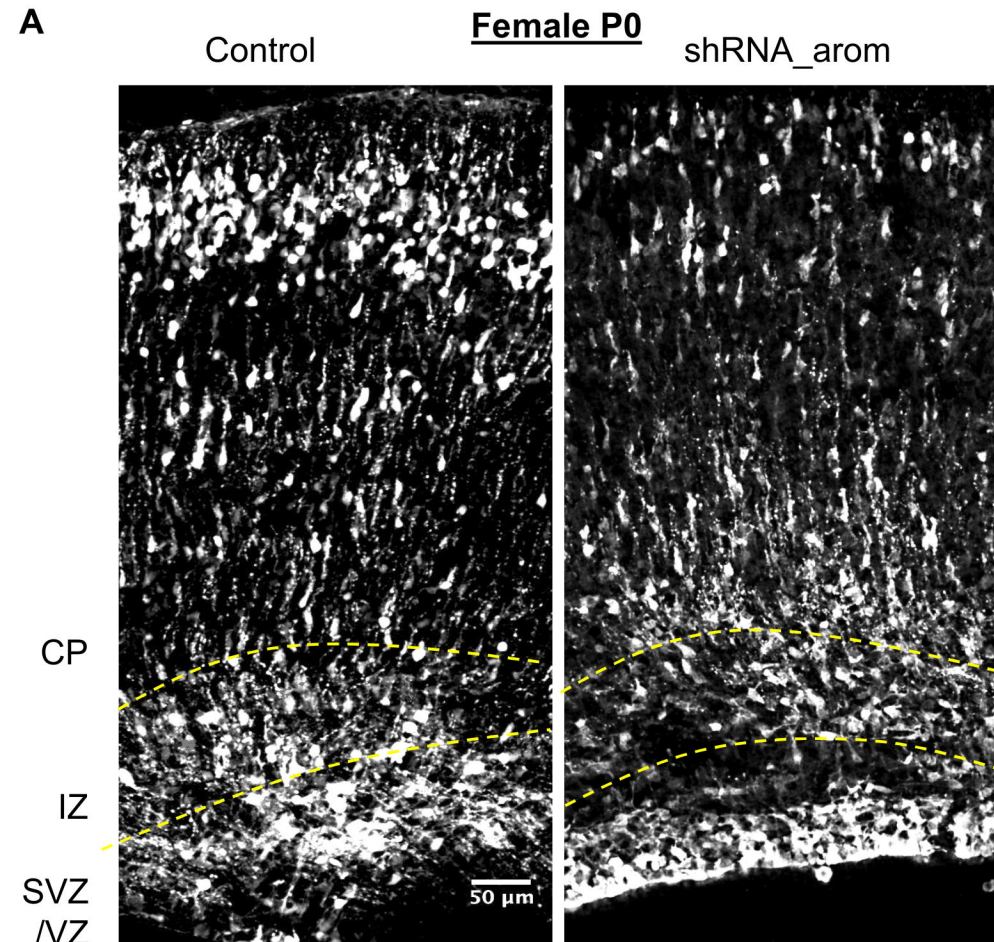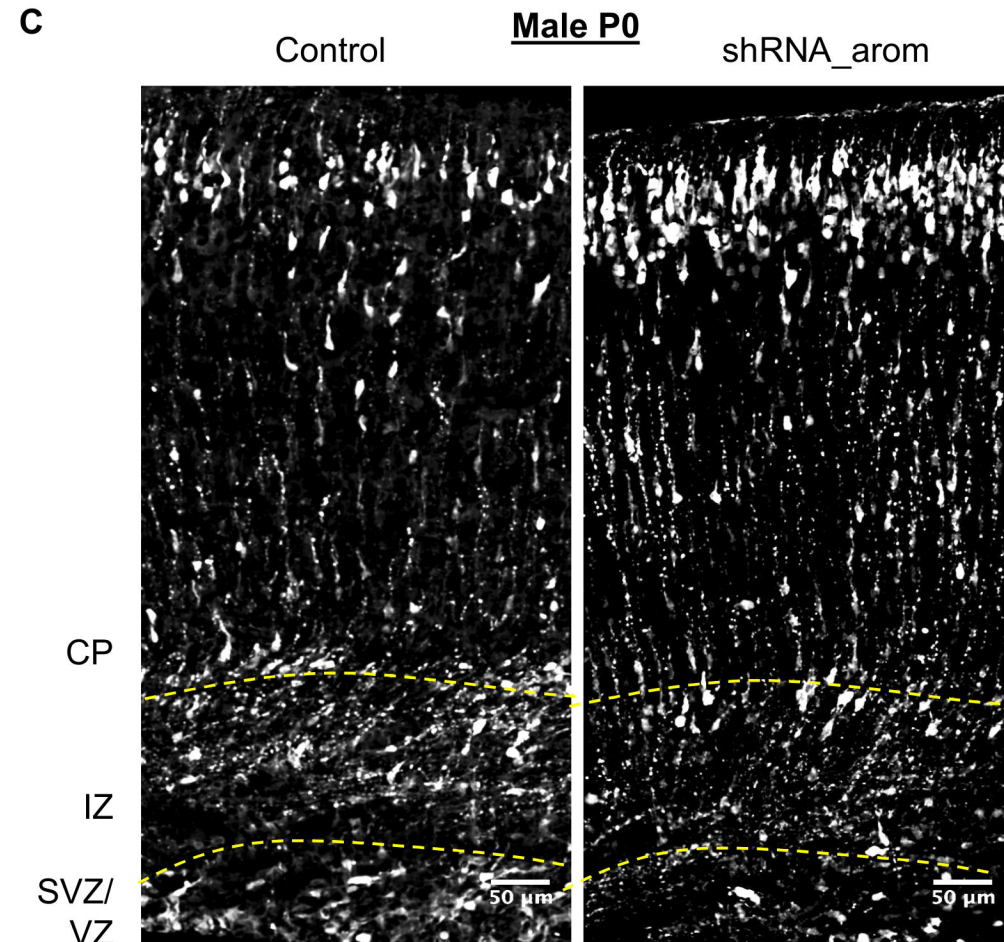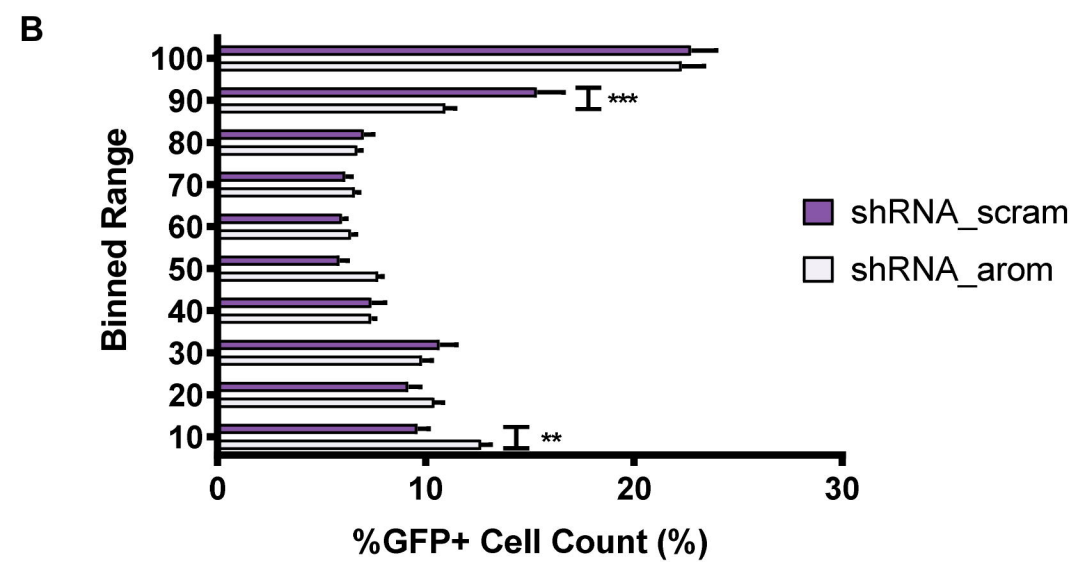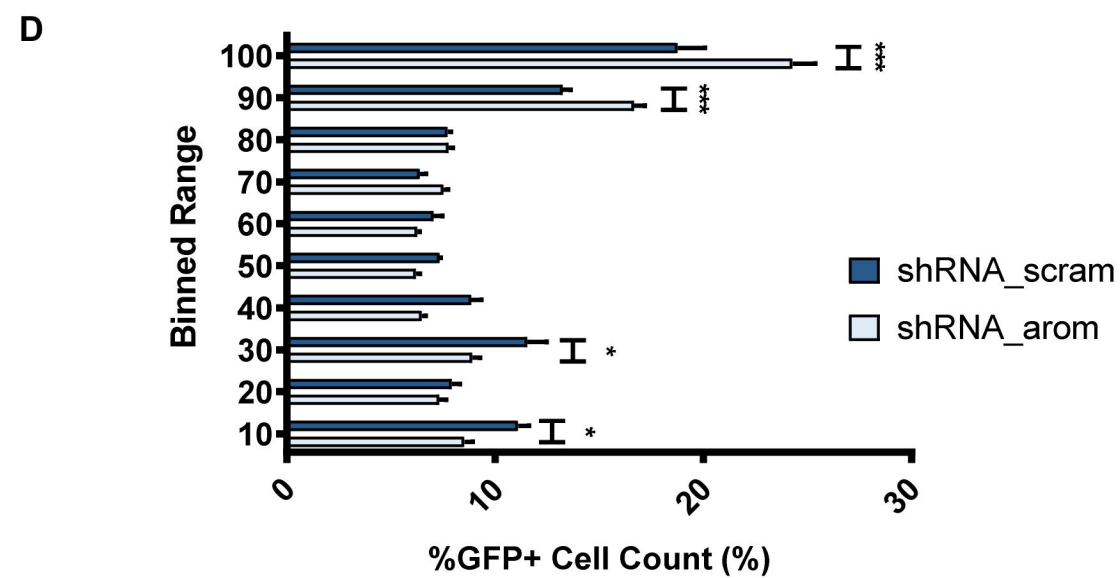

Source: https://www.biorxiv.org/content/10.1101/654731v1.full.pdf
